# Supplementary material for: ReporterSeq reveals genome-wide dynamic modulators of the heat shock response across diverse stressors
Source: eLife journal article supplement (doi:10.7554/elife.57376), 2021-07-05

**Fragment A:** generation of random barcodes associated with random sgRNAs

Step 1a: PCR of constant region

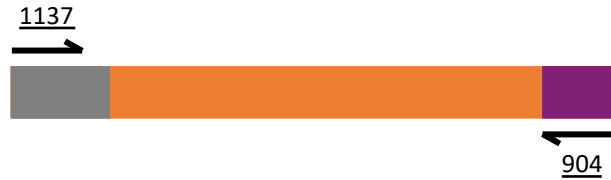

Step 1b: PCR of random sgRNAs

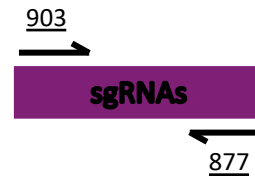

Step 2: PCR of constant region using product of Step 1b as primer

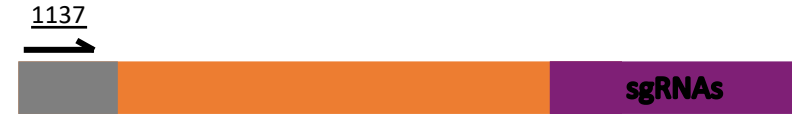

Step 3: PCR to add random barcodes using product of Step 2 as template

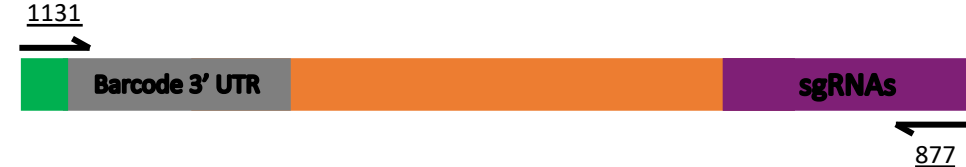

**Fragment B:** PCR to generate constant region that connects Fragments A and C

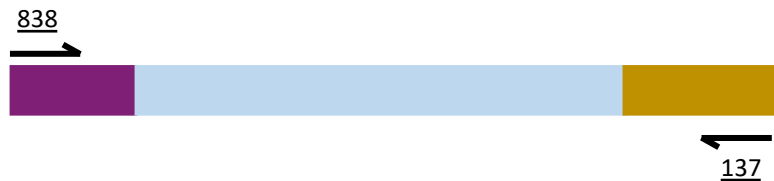

**Fragment C:** Generation of backbone via digestion with BglII and BglIII of parental plasmid containing the reporter

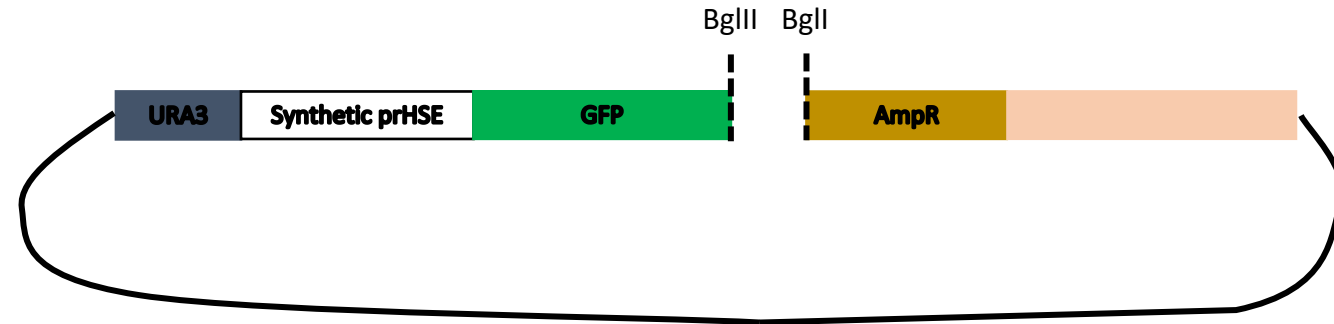

**Plasmid assembly of Fragments A, B and C via Gibson Assembly:**

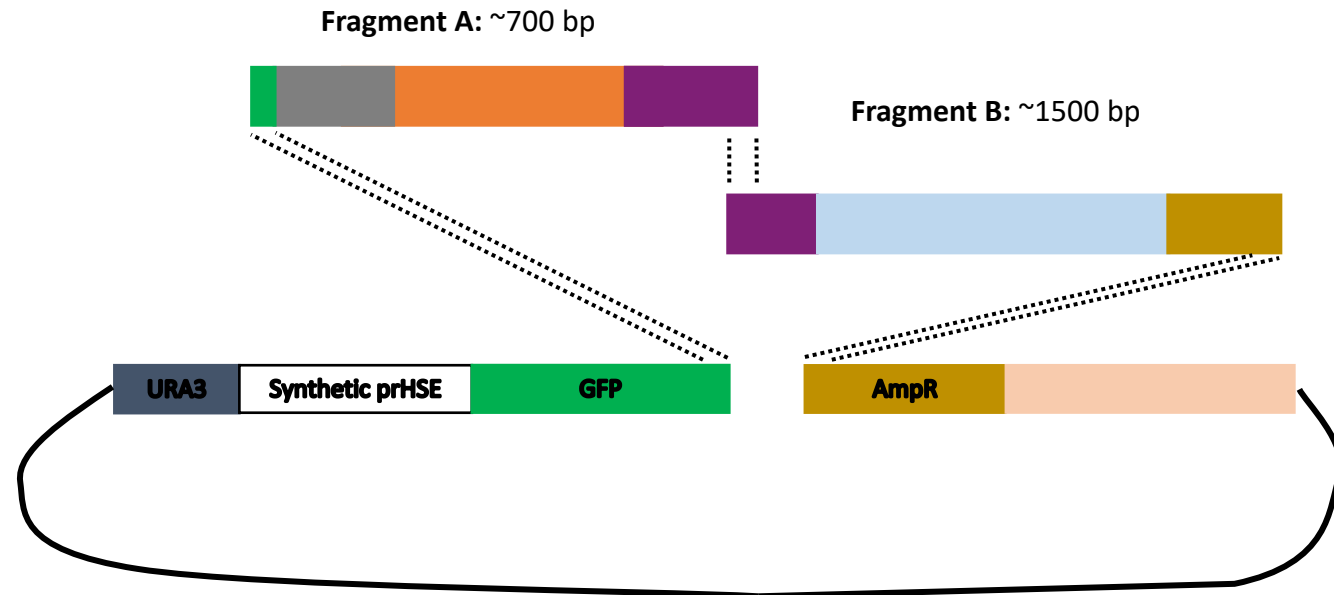

Supplement: supp11 [file library_creation_diagram.pdf › library_creation_diagram.pdf]
