# Supplementary material for: ReporterSeq reveals genome-wide dynamic modulators of the heat shock response across diverse stressors
Source: eLife journal article supplement (doi:10.7554/elife.57376), 2021-07-05
Supplement: supp11 [file library_primer_sequences.xlsx]

## Sheet: Sheet1
Library design primers
Primer name	Sequence
1137	agataaTCTCTGCTTTTGTGcg
904	GATCATTTATCTTTCACTGCGGA
903	tccgcagtgaaagataaatgatc
877	aagctgtttccagcttagct
1131	GGCATGGATGAACTATACAAATAATAAAGATCTTNNNNNNNNNNNNNNNNNNNNNNNNNagataaTCTCTGCTTTTGTGcg
838	GTTTAAGAGCTAAGCTGGAAACAGC
137	ggataaagttgcaggaccac
